# Supplementary material for: Production of anti-PF4 antibodies in antiphospholipid antibody-positive patients is not affected by COVID-19 vaccination
Source: HighWire-hosted journal article supplement (doi:10.1136/rmdopen-2021-001902), 2022-02-01
Supplement: rmdopen-2021-001902supp001_data_supplement.pdf [file rmdopen-2021-001902supp001_data_supplement.pdf]

**Supplemental Table. Severe and non-severe adverse side effects in vaccinated aPL-positive patients and healthcare workers.**

| <b>Manifestations</b>      | <b>aPL-positive patients* (n.44)</b> | <b>Healthcare workers vaccinated with Comirnaty (n.100)</b> | <b>Healthcare workers vaccinated with Vaxzevria (n.50)</b> |
|----------------------------|--------------------------------------|-------------------------------------------------------------|------------------------------------------------------------|
| <i>Severe side effects</i> |                                      |                                                             |                                                            |
| Anaphylactic reactions     | 0/44                                 | 0/44                                                        | 0/44                                                       |
| TTS                        | 0/44                                 | 0/44                                                        | 0/44                                                       |
| Myocarditis/pericarditis   | 0/44                                 | 0/44                                                        | 0/44                                                       |
| Axillary lymphadenopathy   | 0/44                                 | 0/44                                                        | 0/44                                                       |
| <i>Mild side effects</i>   |                                      |                                                             |                                                            |
| Injection-site pain        | 27/44                                | 71/44                                                       | 37/44                                                      |
| Fatigue                    | 21/44                                | 49/44                                                       | 27/44                                                      |
| Headache                   | 16/44                                | 40/44                                                       | 24/44                                                      |
| Muscle pain                | 13/44                                | 39/44                                                       | 23/44                                                      |
| Fever                      | 8/44                                 | 21/44                                                       | 14/44                                                      |
| Joint pain                 | 7/44                                 | 19/44                                                       | 11/44                                                      |
| Chills                     | 6/44                                 | 17/44                                                       | 9/44                                                       |
| Nausea                     | 4/44                                 | 14/44                                                       | 7/44                                                       |
| Swelling                   | 7/44                                 | 17/44                                                       | 10/44                                                      |

\* 38/44 of the aPL positive patients were vaccinated with Comirnaty, 2/44 with Spikevax, 3/44 with Vaxzevria, and 1/44 with Sputnik.
